# Supplementary material for: Upper limb dimensions in adults presenting for elective surgery – implications for blood pressure measurement
Source: Springer Nature journal article supplement (doi:10.1186/s12871-020-00994-z), 2020-04-04
Supplement: MOESM1 [file 17866278]

**3. Participant response:**

When nurses or doctors take my blood pressure (please circle):

- |                                             |              |                  |               |
|---------------------------------------------|--------------|------------------|---------------|
| a. they put the cuff on my lower arm or leg | <b>Never</b> | <b>Sometimes</b> | <b>Always</b> |
| b. it causes bruises to my skin             | <b>Never</b> | <b>Sometimes</b> | <b>Always</b> |
